# Supplementary material for: Endothelial-targeting miR-145 micelles restore barrier function and exhibit atheroprotective effects
Source: Royal Society of Chemistry journal article supplement (doi:10.1039/d4nh00613e), 2025-01-01
Supplement: d4nh00613e1.pdf [file d4nh00613e1.pdf]

## Supporting information

### **Endothelial-Targeting miR-145 Micelles Restore Barrier Function and Exhibit Atheroprotective Effects**

Anisa Ashraf<sup>1</sup>, Yi Huang<sup>1</sup>, Auveen Choroomi<sup>1</sup>, Kyla Johnson<sup>1</sup>, Jocelynn Torres<sup>1</sup>, Eun Ji Chung<sup>\*1,2,3,4,5,6</sup>

<sup>1</sup>Department of Biomedical Engineering, University of Southern California, Los Angeles, CA, 90089, United States.

<sup>2</sup>Division of Vascular Surgery and Endovascular Therapy, Department of Surgery, Keck School of Medicine, University of Southern California, Los Angeles, CA, 90033, United States.

<sup>3</sup>Mork Family Department of Chemical Engineering and Materials Science, University of Southern California, Los Angeles, CA, 90089, United States.

<sup>4</sup>Eli and Edythe Broad Center for Regenerative Medicine and Stem Cell Research, Keck School of Medicine, University of Southern California, Los Angeles, CA, 90033, United States.

<sup>5</sup>Division of Nephrology and Hypertension, Department of Medicine, Keck School of Medicine, University of Southern California, Los Angeles, CA, 90033, United States.

<sup>6</sup>Norris Comprehensive Cancer Center, Keck School of Medicine, University of Southern California, Los Angeles, CA, 90089, United States.

\*Corresponding author

Eun Ji Chung  
Department of Biomedical Engineering  
University of Southern California  
1042 Downey Way, DRB 140  
Los Angeles, CA 90089  
Tel.: +1-213-740-2825  
Fax: +1-213-821-3897

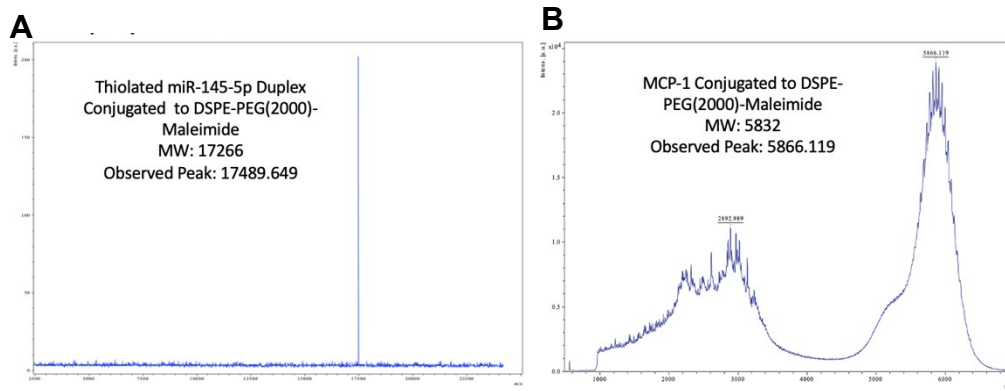

**Figure S1. MALDI characterization of DSPE-PEG(2000)-miR145 and DSPE-PEG(2000)-MCP-1:** **A)** miR-145-SH conjugation to DSPE-PEG(2000)-Maleimide was confirmed through the presence of peak at 17489.649 m/z (expected m/z: 17266 g/mol). **B)** MCP-1 peptide conjugation to DSPE-PEG(2000)-Maleimide was confirmed through the presence of peak at 5866.119 m/z (expected m/z: 5832 g/mol).

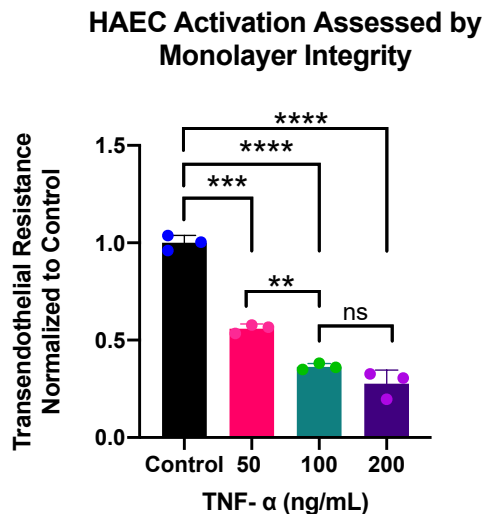

**Figure S2. TEER measurement confirmed the activation of endothelial cells by TNF- $\alpha$ :** HAEC monolayer integrity was reduced from healthy ( $1.00 \pm 0.04$ ) to  $0.56 \pm 0.02$  ( $p < 0.001$ ) when treated with treated with 50 ng/mL TNF- $\alpha$ . When treated with 100 ng/mL, integrity was further reduced to  $0.37 \pm 0.02$  compared to 50 ng/mL and healthy ( $p < 0.01$ ,  $p < 0.0001$ ). Non-significant changes were observed when increasing from 100ng/mL to 200ng/mL ( $0.37 \pm 0.02$  vs.  $0.28 \pm 0.07$ ,  $**p < 0.01$ ,  $***p < 0.001$ ,  $****p < 0.0001$ ,  $n \geq 3$ ).

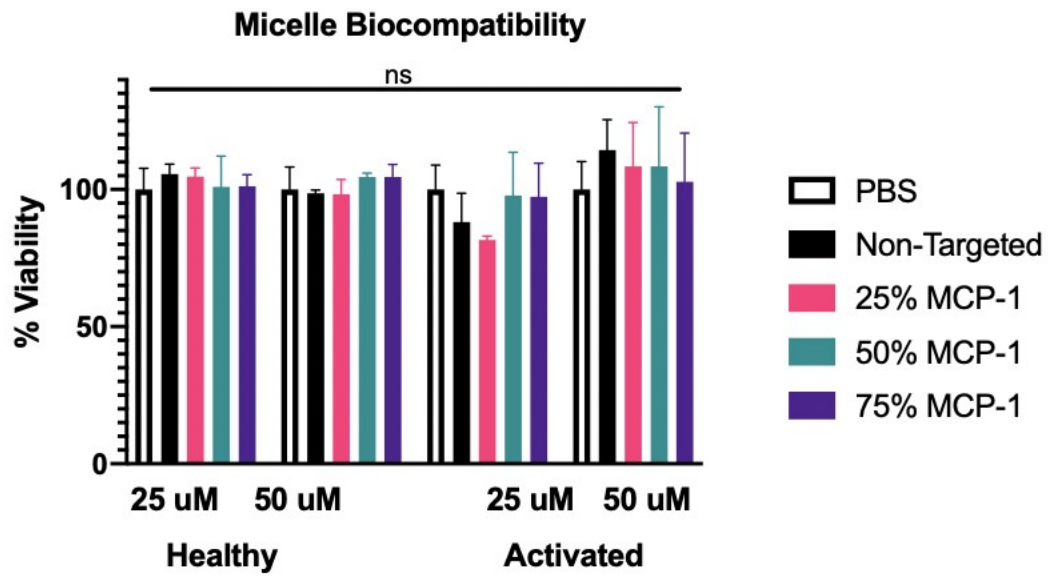

**Figure S3. Biocompatibility of MCP-1 micelles:** Micelle biocompatibility was assessed by MTS on healthy and activated cells and 0-75% molar MCP-1 micelles up to 50  $\mu$ M showed no significant changes in percent viability compared to PBS-treated controls ( $n \geq 5$ ).

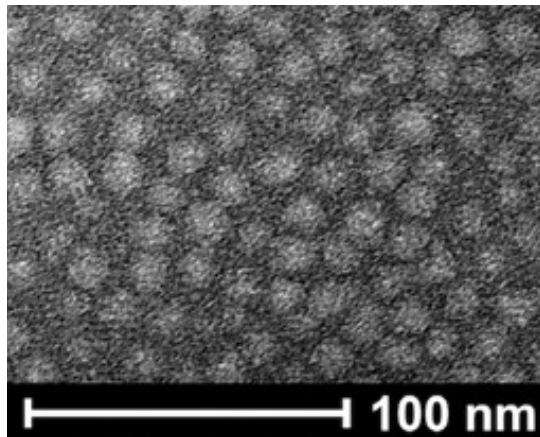

**Figure S4. TEM of miR-145 micelles:** miR-145 micelles were negatively stained with uranyl acetate and visualized with TEM which shows a spherical, monodisperse micelle population.

| Micelle | Dispersant | Time (min) | Size (nm)    | Polydispersity | Zeta (mV)    |
|---------|------------|------------|--------------|----------------|--------------|
| miR-145 | PBS        | 0          | 18.70 ± 0.06 | 0.04 ± 0.015   | 1.15 ± 1.89  |
| miR-145 | PBS        | 30         | 17.30 ± 0.65 | 0.05 ± 0.006   | -4.14 ± 1.41 |
| miR-145 | PBS        | 240        | 19.80 ± 0.48 | 0.05 ± 0.002   | -2.99 ± 0.39 |
| miR-145 | Media      | 0          | 22.10 ± 0.15 | 0.05 ± 0.005   | -3.54 ± 1.92 |
| miR-145 | Media      | 30         | 18.60 ± 1.58 | 0.10 ± 0.007   | -3.85 ± 2.25 |
| miR-145 | Media      | 240        | 19.00 ± 2.55 | 0.05 ± 0.001   | -5.19 ± 1.05 |
| MCP-1   | PBS        | 0          | 15.90 ± 0.31 | 0.05 ± 0.006   | -1.22 ± 1.12 |
| MCP-1   | PBS        | 30         | 23.80 ± 1.21 | 0.12 ± 0.016   | 5.49 ± 3.042 |
| MCP-1   | PBS        | 240        | 24.00 ± 2.03 | 0.06 ± 0.031   | -8.46 ± 4.31 |
| MCP-1   | Media      | 0          | 22.60 ± 1.15 | 0.11 ± 0.072   | 0.66 ± 3.42  |
| MCP-1   | Media      | 30         | 20.21 ± 0.85 | 0.07 ± 0.04    | -4.22 ± 2.03 |
| MCP-1   | Media      | 240        | 20.84 ± 1.56 | 0.07 ± 0.02    | -6.35 ± 1.09 |

**Figure S5. Stability of miR-145 and MCP-1 micelles in media conditions:** miR-145 and 50% molar MCP-1 micelles were incubated in PBS or media at 37°C for up to 4 hours (240 minutes) and their size, polydispersity, and zeta potential were measured through dynamic light scattering and Zetasizer. No significant changes in size, polydispersity, or charge were found throughout the incubation ( $n \geq 3$ ).

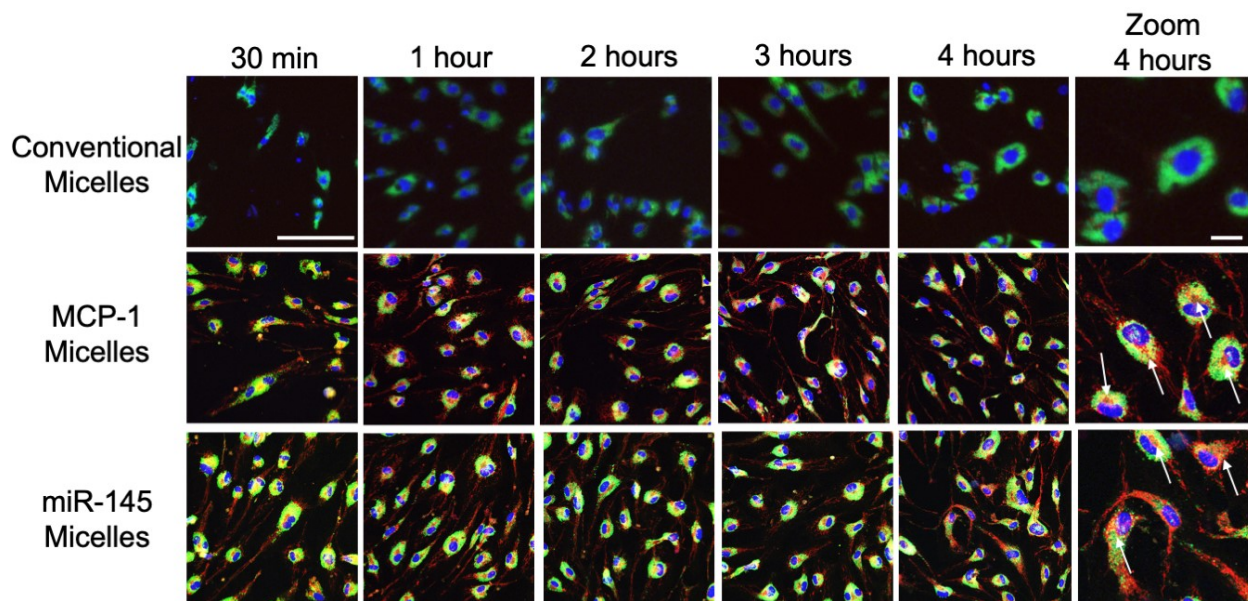

**Figure S6. Micelle binding and internalization over time:** Activated HAEC were incubated with 50% molar MCP-1 micelles and miR-145 micelles for up to 4 hours and visualized via confocal microscopy and white arrows indicate endosomal escape (green = lysotracker, blue = cell nuclei, red = micelles, top left scale bar = 100  $\mu$ m, top right scale bar = 10  $\mu$ m,  $n \geq 6$ ).
